1                   The Hitchhiker's Guide to the Periplasm:  
2                   Unexpected Molecular Interactions of Antibiotics  
3                   Revealed by Considering Crowding Effects in *E. coli*

4  
5                   Conrado Pedebos<sup>1</sup>, Iain P. S. Smith<sup>1</sup>, Alister Boags<sup>1,2</sup>, Syma Khalid<sup>1\*</sup>

6  
7  
8  
9                   <sup>1</sup>School of Chemistry, University of Southampton, Highfield Campus, Southampton  
10                   SO17 1BJ, UK

11                   <sup>2</sup>Bioinformatics Institute (A\*STAR), 30 Biopolis Street, #07-01 Matrix, Singapore  
12                   138671, Singapore  
13

14                   \*To whom correspondence should be addressed. E-mail: [S.Khalid@soton.ac.uk](mailto:S.Khalid@soton.ac.uk)

27

28

## 29 **Abstract**

30 The periplasm of Gram-negative bacteria is a highly crowded environment comprised of  
31 many different molecular species. Antibacterial agents that causes lysis of Gram-negative  
32 bacteria by their action against the inner membrane must cross the periplasm to arrive at  
33 their target membrane. Very little is currently known about their route through the  
34 periplasm, and the interactions they experience. To this end, here atomistic molecular  
35 dynamics simulations are used to study the path taken by the antibiotic polymyxin B1  
36 through a number of models of the periplasm which are crowded with proteins and  
37 osmolytes to different extents. The simulations reveal that PMB1 forms transient and  
38 long-lived interactions with proteins and osmolytes that are free in solution as well as  
39 lipoproteins anchored to the outer membrane and bound to the cell wall. We show that  
40 PMB1 may be able to ‘hitchhike’ within the periplasm by binding to lipoprotein carriers.  
41 Overall our results show that PMB1 is rarely uncomplexed within the periplasm; an  
42 important consideration for interpretations of its therapeutic mechanism of action. It is  
43 likely that this observation can be extended to other antibiotics that rely on diffusion to  
44 cross the periplasm.

45

46

47

48

49

50

51

52

53

54

55

56

57

58

59

60

## 61 Introduction

62

63 The periplasm of Gram-negative bacteria is a crowded aqueous compartment bounded  
64 by the inner and outer membranes. The cell wall is contained within the periplasm as well  
65 as hundreds of proteins including chaperones, transporters proteases and nucleases<sup>1,2</sup>.

66 The solution also contains a range of osmolytes, including urea, sugars, spermidine and  
67 putrescine. This makes for a complex and crowded environment for any molecular  
68 species to negotiate when moving across the periplasm towards either membrane.

69 Very little is known about the spatial arrangement of these myriad molecules within the  
70 periplasm. In other words, it is not known if the proteins and osmolytes are evenly  
71 distributed, or if is there some degree of organization and if so, to what extent. This makes  
72 it very difficult to predict the interactions experienced by molecules within the periplasm.

73 This extends to molecules that are not native to the bacteria, such as antibacterial agents.

74 Thus, we have little information regarding which moieties of antibiotics are available to  
75 carry out the desired functions, and which are unavailable as they are involved in  
76 interactions with native proteins/osmolytes/cell wall. To this end we have conducted a

77 study of polymyxin B1 (PMB1) within models of the *E. coli* periplasm. PMB1 is a  
78 lipopeptide antibiotic used as a “last resort” drug for the treatment of infections caused by  
79 Gram-negative bacteria<sup>3</sup>. PMB is composed of a cyclic, cationic polypeptide ring

80 connected to a branched fatty acid tail. The cationic ring contains five residues of the  
81 irregular amino acid  $\alpha,\gamma$ -Diamino Butyric acid (DAB), each of which contributes a charge  
82 of +1 e giving PMB1 an overall charge of +5 e. The cationic ring enables solubility in

83 aqueous solvents, whereas the lipid tail facilitates insertion into bacterial membranes<sup>4-7</sup>.

84 While PMB1 along with colistin (polymyxin E) were for many years, last resort antibiotics,  
85 in recent years bacterial strains that are resistant to both antibiotics have emerged in a  
86 number of countries<sup>8,9</sup>. Thus, in order to either modify these drugs or to develop

87 completely novel antibiotics, it is timely to establish a thorough, molecular-level  
88 understanding of each stage of the process *via* which they bring about bacterial cell death.

89 To date, mechanistic studies of PMB1 have focused almost entirely on the two

90 membranes of Gram-negative bacteria<sup>7,10</sup>, leaving unaddressed the question, how does  
91 PMB1 cross the periplasm to get from the outer membrane to the inner membrane?  
92 Here, a series of atomistic molecular dynamics simulations (Table 1) were performed of  
93 models of portions of the *E. coli* cell envelope. The simulation systems contain an  
94 asymmetric model of the outer membrane composed of LPS and phospholipids, a single-  
95 layered cell wall, various proteins/lipoproteins, osmolytes and PMB1, with systems sizes  
96 ranging from 200,000 to 750,000 atoms. The proteins are a combination of Braun's  
97 lipoprotein (BLP), LolA, LolB, OmpA, and Pal (Fig1). BLP is the most abundant protein in  
98 *E. coli* (there are an estimated  $10^5$  copies of BLP in each *E. coli*<sup>11</sup>). It exists as a coiled-  
99 coil trimer that is essential for compartment stability<sup>12</sup>. It is anchored in the outer  
100 membrane *via* a lipidated moiety at its N-terminus, whereas it is covalently bound to  
101 peptidoglycan *via* its C-terminus. LolA and LolB are small soluble proteins that carry  
102 lipoproteins<sup>13,14</sup>, they are largely similar in structure, although LolB is anchored to the OM  
103 *via* a lipidated moiety whereas LolA is free to diffuse across the cell envelope. OmpA is  
104 composed of an eight-stranded barrel which is located in the OM, and is connected *via* a  
105 linker to the soluble domain that can bind peptidoglycan in the periplasm<sup>15,16,17</sup>. Pal also  
106 has a lipidated anchor in the OM like LolB, while its C-terminal domain resembles the  
107 OmpA soluble domain. Like OmpA, Pal also has a linker that can extend into the  
108 periplasm enabling the protein to bind non-covalently to peptidoglycan, thereby assisting  
109 with maintaining compartment integrity<sup>18,19</sup>. Where present, in each system there are 4 x  
110 BLPs and 1 x each of OmpA, Pal, LolA and LolB. The most compositionally complex  
111 system studied here also contained a range of osmolytes, in order to better represent the  
112 crowded environment that these molecules encounter in the periplasm.  
113 The osmolytes incorporated into our periplasmic model were selected on the basis of a  
114 combination of their abundance and chemical diversity. Importantly, all of these osmolytes  
115 have their concentrations in the periplasm either documented or estimated in the  
116 literature<sup>20-25</sup> and these concentrations are reproduced here: osmoregulated periplasmic  
117 glucans (OPG) (20 mM), trehalose (10 mM), putrescine (30 mM), spermidine (3 mM),  
118 glycerol (36 mM) and urea (20 mM). Both OPG and trehalose are widely distributed in  
119 Bacteria, with OPG having a prominent role on regulating osmotic pressure and  
120 virulence<sup>26</sup>, whereas trehalose is mainly involved in response to stress conditions<sup>27</sup>. The

121 polyamines, putrescine and spermidine, are the two most common in all bacteria, with  
122 functions that includes supporting bacterial growth, incorporation into the cell wall, and  
123 biosynthesis of siderophores<sup>28</sup>. Glycerol is metabolized in *E. coli* cells for different  
124 applications, both aerobically and anaerobically<sup>29,30</sup>. Urea is a source of nitrogen, after its  
125 breakdown<sup>31</sup>.

126 Simulations were initiated by placing PMB1 molecules randomly in the aqueous region  
127 between the outer membrane and the cell wall. The osmolyte concentrations are derived  
128 from literature values and the number of proteins is selected to reproduce crowding  
129 volume fraction of  $\phi \sim 0.21$  as estimated from experimental studies<sup>20</sup>. A set of simulations  
130 of PMB1 in just water and ions was also performed for comparison.

131

## 132 Results

133 Table 1 provided a summary of the simulations performed in this study. Initial  
134 observations focused on general mobility and aggregation of PMB1 followed by in depth  
135 analyses probing the causes of these observations.

136

137 **Table 1.** Summary of all simulated systems.

| Simulations          |                                 |                |                                                                                            |            |             |
|----------------------|---------------------------------|----------------|--------------------------------------------------------------------------------------------|------------|-------------|
| System               | Proteins                        | PMB1 Molecules | Osmolytes and Ions <sup>a</sup>                                                            | Length     | Force field |
| PMB <sub>only</sub>  | None                            | 30             | Na <sup>+</sup> , Cl <sup>-</sup>                                                          | 1 $\mu$ s  | GROMOS 54a7 |
| PMB <sub>dil</sub>   | BLP (x4)                        | 30             | Na <sup>+</sup> , Cl <sup>-</sup>                                                          | 2 x 500 ns | GROMOS 54a7 |
| PMB <sub>prot</sub>  | BLP (x4), LolA, LolB, Pal, OmpA | 30             | Na <sup>+</sup> , Cl <sup>-</sup>                                                          | 2 x 500ns  | GROMOS 54a7 |
| PMB <sub>crowd</sub> | BLP (x4), LolA, LolB, Pal, OmpA | 30             | Na <sup>+</sup> , Cl <sup>-</sup> , Glycerol, Urea, Trehalose, Spermidine, Putrescine, OPG | 2 x 500 ns | GROMOS 54a7 |

138 <sup>a</sup> Molar concentration: Na<sup>+</sup>, Cl<sup>-</sup> (200 mM), Glycerol (35mM), Urea (30mM), Trehalose (10 mM), Spermidine (0.2 mM),  
139 Putrescine (30 mM), Osmoregulated Periplasmic Glucans (OPG - 20 mM).

140

141 The crowded nature of the systems had a clear impact upon the solvent accessible  
142 surface area (SASA) of PMB1 (Fig. 1). The SASA is lower when PMB1 molecules are just  
143 in water and counter ions (PMB1<sub>only</sub>), compared to when in the protein-containing systems

144 (PMB1<sub>dil</sub>, PMB1<sub>prot</sub> and PMB1<sub>crowd</sub>). Tracking the PMB1 motion within the XY plane (Fig.  
145 S1) of the protein-containing systems shows the movement of polymyxins in the crowded  
146 systems (PMB1<sub>crowd</sub> and PMB1<sub>prot</sub>) is more confined compared to PMB1<sub>dil</sub> in which BLP  
147 is the only protein. Additionally, in the latter system, more PMB1 molecules moved  
148 towards the outer membrane and the cell wall rather than remaining in the solution area  
149 between these two large structures, compared to PMB1<sub>crowd</sub> and PMB1<sub>prot</sub>. Another effect  
150 observed with increasing system complexity is the slower diffusion of PMB1 (Fig. 2A and  
151 Fig. S2), by calculation of the translational diffusion coefficients ( $D_t$ ) from two different  
152 time regimes (1-10ns; and 50-100ns). For the PMB<sub>only</sub> system, the  $D_t$  from the longer time  
153 regime was estimated to be  $4.0 \pm 0.3 \times 10^{-6} \text{ cm}^2/\text{s}$ , while for PMB<sub>dil</sub>, PMB<sub>prot</sub>, and PMB<sub>crowd</sub>  
154 systems, the values were  $3.8 \pm 0.4 \times 10^{-8} \text{ cm}^2/\text{s}$ ,  $2.9 \pm 0.3 \times 10^{-8} \text{ cm}^2/\text{s}$  and  $2.0 \pm 0.4 \times 10^{-}$   
155  $^8 \text{ cm}^2/\text{s}$ , respectively, demonstrating a major reduction when compared to PMB<sub>only</sub> (100-  
156 fold). The slowest diffusion is recorded for the most crowded system.

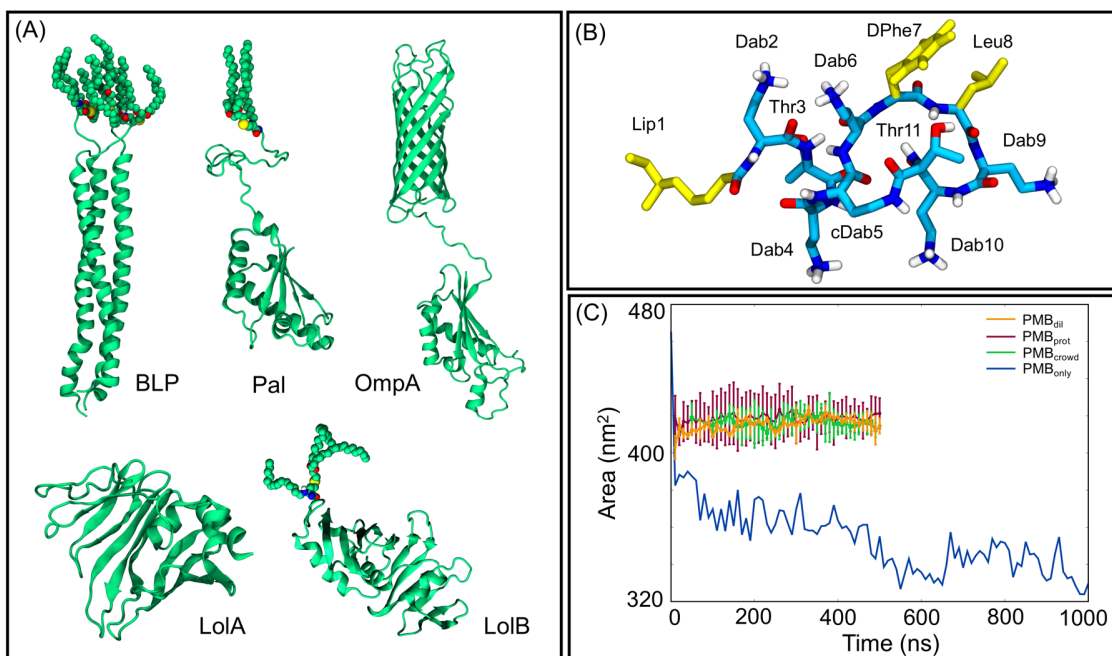

157  
158 **Figure 1. Summary of proteins studied and SASA data. Panel (A) shows the**  
159 **structures of the five proteins simulated in this study. Panel (B) shows the structure**  
160 **of PMB1 and panel (C) provides a summary of SASA versus time for each system.**  
161

162 The dynamics of water was also impacted by crowding (Fig. 2B), with a  $D_t$  rate of  $4.93 \pm$   
 163  $0.4 \times 10^{-5} \text{ cm}^2/\text{s}$  in  $\text{PMB}_{\text{only}}$  compared to  $2.49 \pm 0.1 \times 10^{-5} \text{ cm}^2/\text{s}$  in  $\text{PMB}_{\text{crowd}}$  for the 50-100  
 164 ns time period. The values found for systems in the presence of the outer membrane are  
 165 similar to a previous report<sup>32</sup> of simulations of the outer membrane in water using the SPC  
 166 water model<sup>33</sup> and with crowded simulations<sup>34</sup> using a different water model. Protein  
 167 diffusion rates were also calculated for the  $\text{PMB}_{\text{dil}}$ ,  $\text{PMB}_{\text{prot}}$ , and  $\text{PMB}_{\text{crowd}}$  systems,  
 168 showing  $D_t$  values that also decrease with increasing crowding volume fraction  $\phi$ .  
 169 Although LolA is neither bound to the cell wall nor anchored/embedded in the membrane,  
 170 its calculated  $D_t$  falls in the same range as the other proteins indicating that overall protein  
 171 motion is quite restricted in the crowded systems for all proteins. While the environment  
 172 we have simulated is more complex due to the presence of membrane and cell wall, the  
 173 diffusion rates for proteins calculated here are comparable to previous reports involving  
 174 simulations of crowded environments<sup>35</sup> and cytoplasm models<sup>36,37</sup>, as well as with  
 175 experimental data from GFP proteins at the periplasm and cytoplasm<sup>38</sup>.  
 176

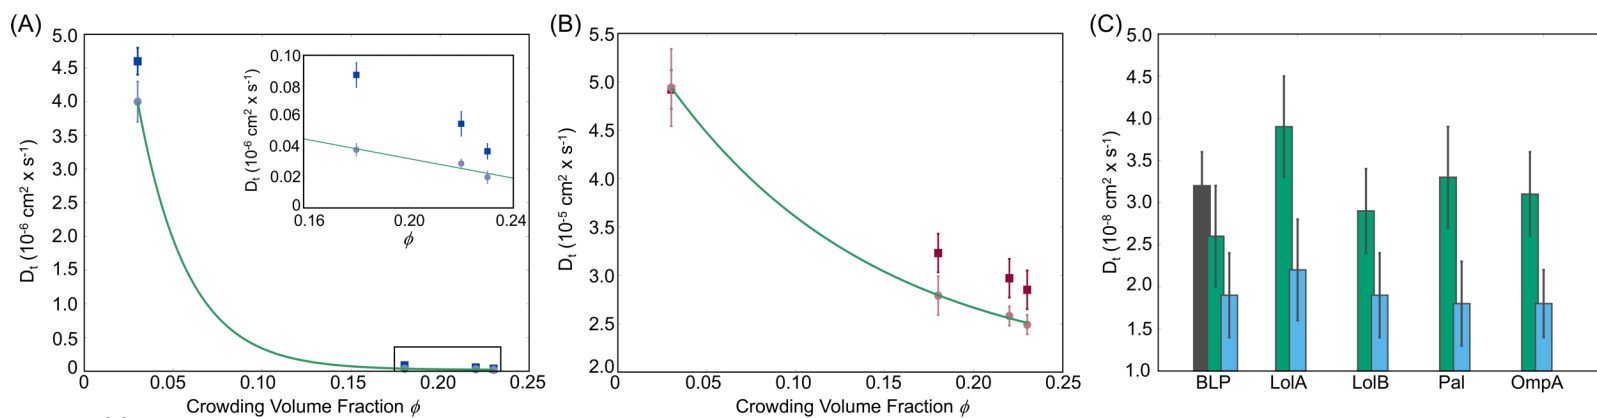

178 **Figure 2: Translational diffusion coefficients ( $D_t$ ) obtained for PMB1 (left panel),**  
 179 **water (middle panel), and proteins (right panel). (A):  $D_t$  values calculated for two**  
 180 **different time regimes, 1-10 ns (blue) and 10-100 ns (grey), as a function of the**  
 181 **crowding volume fraction  $\phi$  of each system ( $\text{PMB}_{\text{only}} = 0.03$ ;  $\text{PMB}_{\text{dil}} = 0.18$ ;  $\text{PMB}_{\text{prot}}$**   
 182  **$= 0.22$ ;  $\text{PMB}_{\text{crowd}} = 0.23$ ). (B):  $D_t$  values obtained for water molecules in the same**  
 183 **time regimes as above, 1-10 ns (red) and 10-100 ns (pink), as a function of the**  
 184 **crowding volume fraction  $\phi$ . Exponential fits were applied for the long-time scale**  
 185 **regimes. (C): Histogram showing  $D_t$  values for each protein in each system ( $\text{PMB}_{\text{dil}}$**



186 = black;  $\text{PMB}_{\text{prot}}$  = green;  $\text{PMB}_{\text{crowd}}$  = blue). Error bars indicate standard error for all  
187 molecules across all repeat simulations.

188

189 In this study we seek to characterize the molecular interactions that underpin the  
190 aforementioned SASA, lateral motion and translational diffusion profiles calculated from  
191 our simulations. The complexity of the system composition is such that a vast amount of  
192 data regarding molecular interactions is generated from these simulations. To facilitate  
193 interpretation of the observations we have presented the results from the perspective of  
194 PMB1 interactions, namely PMB1 interactions with itself, osmolytes, proteins, and the cell  
195 wall.

196

197

### 198 **PMB1 self-interactions**

199

200 In systems containing only PMB1 in solution ( $\text{PMB}_{\text{only}}$ ), differently sized aggregates  
201 (dimers to pentamers) formed during the simulations. The lifetimes of interactions  
202 between PMB1 molecules ranged from short periods (a few nanoseconds) to longer term  
203 interactions (200-400 ns) leading to formation of aggregates, as shown in the example in  
204 Fig. 3A-B. A range of different configurations were observed during the simulations. The  
205 majority of the interactions occurred *via* the hydrophobic portions of PMB1, namely Lip1,  
206 DPhe7, and Leu8, while the charged sites remained largely exposed to water and ions  
207 (Fig. 3A-B). In the example of a tetrameric association as shown in Fig. 3A, four of the  
208 PMB1 molecules had their Lip1 tails buried in the middle of the aggregate along with two  
209 DPhe7 and three Leu8 moieties, thus forming a structure that resembled a micelle. Due  
210 to the exposure to the aqueous environment of the positive charges and polar residues  
211 in this tetramer, the surface of the micelle-like structure was decorated by  $\text{Cl}^-$  ions, which  
212 interacted mostly with the  $\text{NH}_3^+$  groups from Dab residues. The center of the micelle was  
213 mostly protected from exposure to water (Fig. 3D), with only one constant water molecule  
214 present at 0.5 nm (Fig. S3). This self-assembly behavior has previously been reported for  
215 other similar amphiphilic antibiotics, such as colistin and colistin methanesulfonate  
216 (CMS), but shown not to occur for the non-amphiphilic polymyxin B nonapeptide, an  
217 analogue that lacks the hydrophobic tail<sup>39</sup>. In the cases previously reported, aggregate

218 diameters were calculated to have a z-average of around  $2 \text{ nm} \pm 0.3$ , which correlates  
219 well with the tetrameric aggregate observed in our simulations ( $2.2 \text{ nm} \pm 0.5$ ). Thus, as  
220 predicted for colistin and its analogue<sup>39</sup>, PMB1 micelle formation followed a “closed  
221 association” model, where the number of monomers per micelle does not exceed five in  
222 our simulations. In the PMB<sub>dil</sub>, PMB<sub>prot</sub>, and PMB<sub>crowd</sub> systems, interactions between  
223 PMB1s resulted in smaller aggregates, generally involving dimerization (but with the  
224 additional participation of other molecular species, as discussed in the next section).

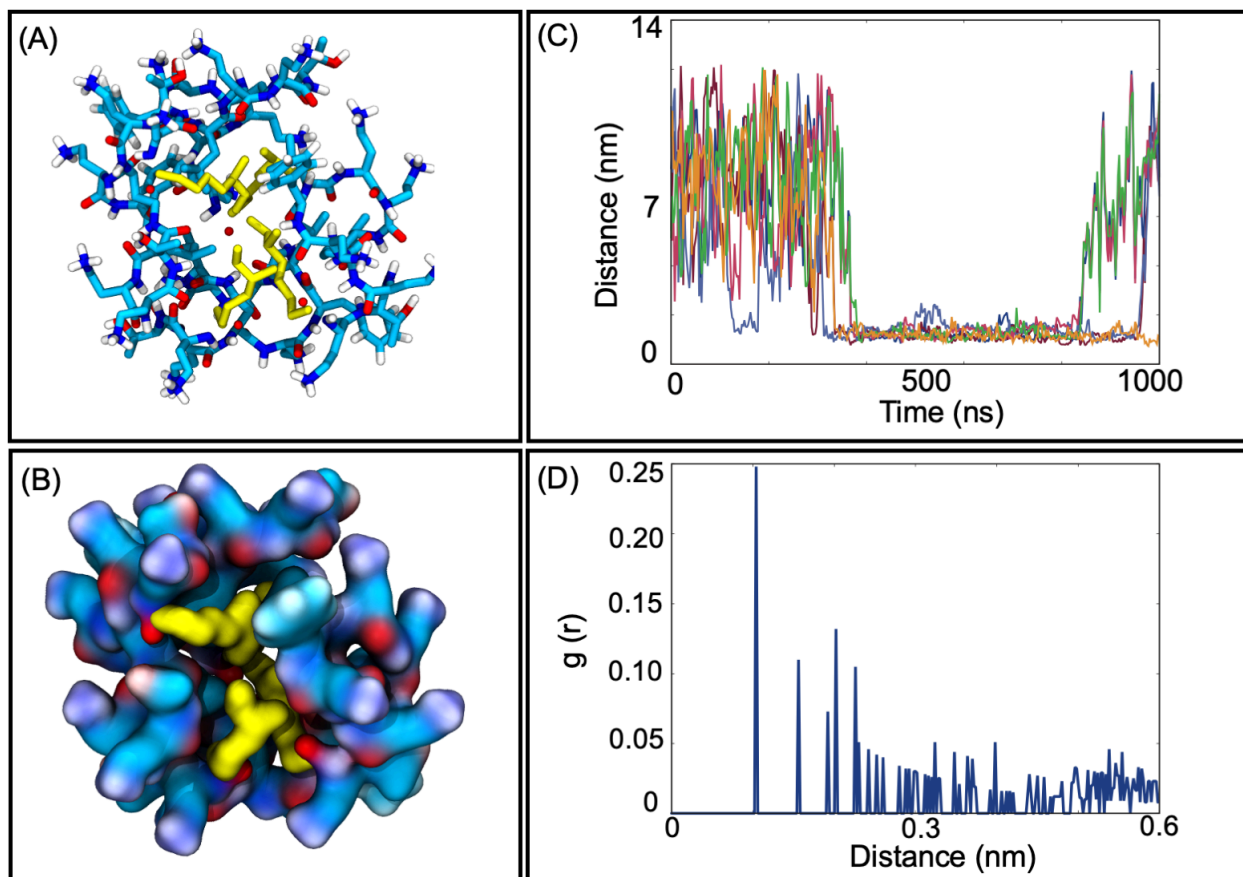

225  
226 **Figure 3: Micelle-like associations observed during the simulations. Sticks (A) and**  
227 **surface (B) representations of a tetrameric micelle, with the hydrophobic portions**  
228 **pointing inwards the aggregate colored in yellow. (C) Distances calculated between**  
229 **the center of mass (COM) of each monomer composing the micelle structure. Each**  
230 **curve describes the distance between two different monomers, with values below**  
231 **the 2 nm threshold indicating an association. (D) Radial Distribution Function**  
232 **(RDF) for water molecules calculated using the COM of the whole aggregate as a**  
233 **reference point.**

234

## 235 **PMB1 interaction with osmolytes**

236 The interaction of PMB1 with osmolytes and ions was firstly characterized by measuring  
237 the proximity of each type of osmolyte to PMB1 molecules. The radial distribution function  
238 (RDF) of each osmolyte with PMB1s as a reference (Fig. 4) showed a clear preference  
239 for glycerol and OPG. This is reasonable considering the number of polar groups  
240 available for interactions on both osmolytes and the negative charge ( $-1 e$ ) on the  
241 phosphate group of OPGs. Putrescine, spermidine and  $\text{Na}^+$  ions were found furthest from  
242 PMB1, which correlates with both being positively charged (putrescine =  $+2 e$ , spermidine  
243 =  $+4 e$ ).

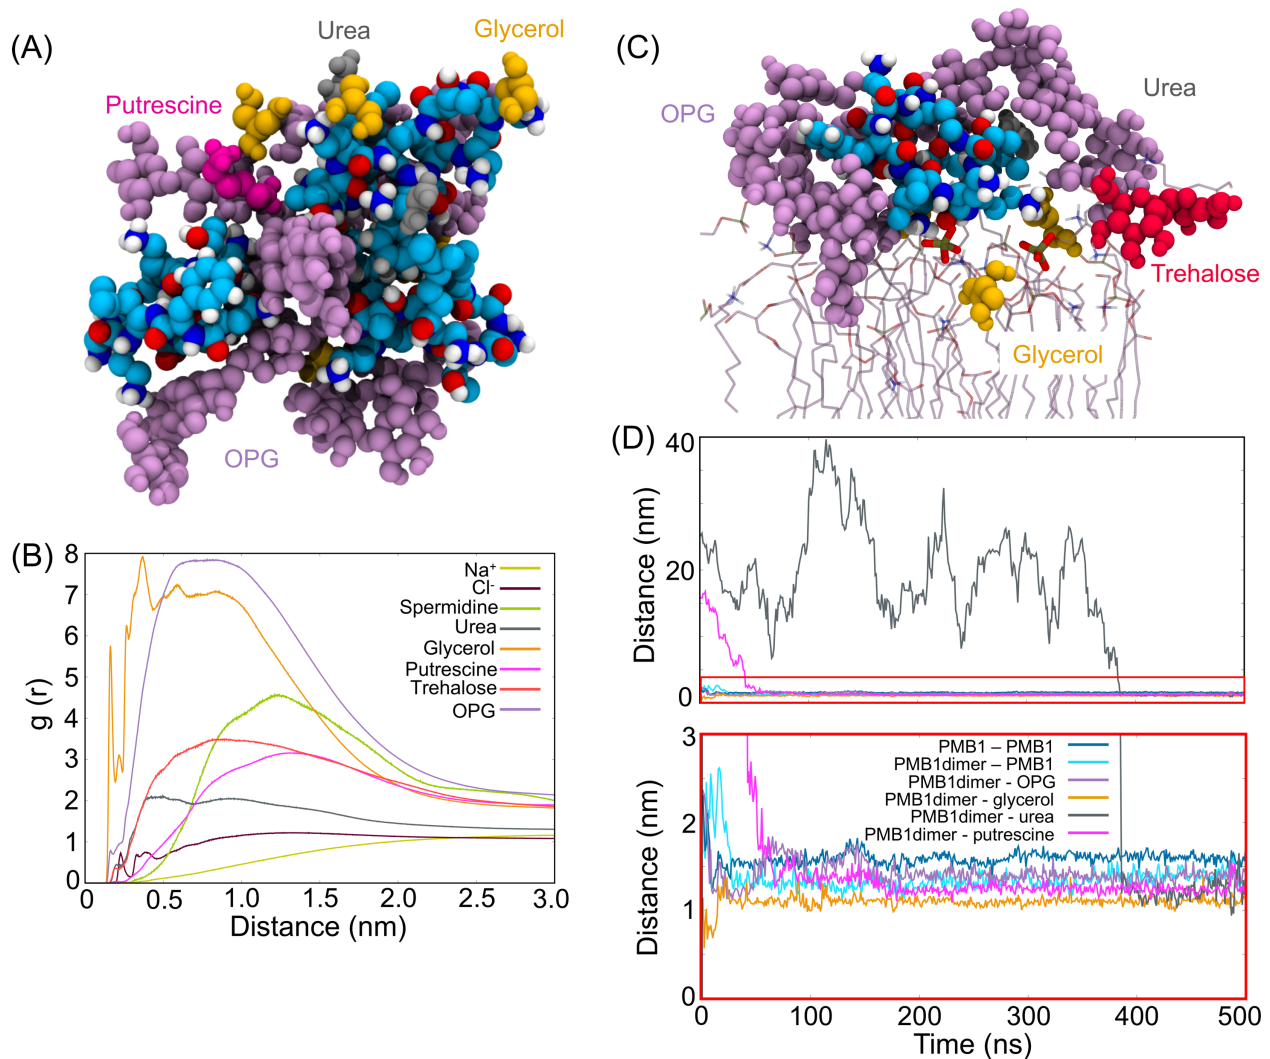

244

245 **Figure 4: Osmolyte distribution and cluster formation in PMB<sub>crowd</sub>. (A) Cluster**  
246 **formed by three PMB1 molecules (cyan, white, red, blue), five OPG molecules**  
247 **(violet), four glycerol molecules (orange), two urea molecules (grey) and one**  
248 **putrescine molecule (magenta). (B) Radial distribution function (RDF) using PMB1**  
249 **as a reference point with Glycerol (orange), OPG (violet) and Cl<sup>-</sup> (maroon), Na<sup>+</sup>**  
250 **(yellow), Putrescine (magenta) and Spermidine (light green), urea (grey) and**  
251 **trehalose (red). (C) Cluster formed at the surface of the outer membrane involving**  
252 **one PMB1 molecule, three OPG molecule, two glycerol molecules, one urea**  
253 **molecule and one trehalose molecule (colors as in (A)). Phosphate groups (brown**  
254 **and red sticks) form salt bridge interactions with Dab6 and Dab10 residues of**  
255 **PMB1. (D) Distances between representative molecules forming clusters are shown**  
256 **in panel (A), with a zoomed-in area marked with a red rectangle. Colored curves**  
257 **correspond to PMB1-PMB1, PMB1dimer-PMB1, PMB1dimer-OPG, PMB1dimer-**  
258 **glycerol and PMB1dimer-urea.**

259

260 It has been discussed previously<sup>35,40-44</sup> that in crowded cellular environments, non-  
261 specific binding occurs constantly, generating transient clusters that affect the structure  
262 and dynamics of the molecules in this environment. In the simulations performed here,  
263 we observed formation of small osmolyte-PMB1 clusters which had an average size ~2.5  
264 - 3.0 nm (slightly larger than the PMB1 micelles described in the previous section). These  
265 clusters generally contained PMB1 monomers interacting directly with OPG (*via* -OH  
266 groups and cyclohexane rings) and glycerol (*via* -OH groups), although participation of  
267 other osmolytes such as putrescine and urea was also observed, but usually without  
268 these molecules directly interacting with PMB1. In particular, the association between  
269 PMB1 molecules and OPG was prevalent (as shown in the RDF in Fig 4). For example,  
270 in one case, four OPG molecules bound around the surface of a PMB1 dimer (Fig. 4A),  
271 while a fifth OPG molecule mediated the interaction between the PMB1 dimer and a third  
272 PMB1 molecule. Four additional molecules of glycerol, one putrescine and two urea  
273 molecules also participated in this cluster, effectively bridging the PMB1 dimer to the third  
274 PMB1 (Fig. 4D), stabilizing the complex. This cluster took ~ 100 ns to stabilize in terms  
275 of number of components, apart from one urea molecule which only joined the cluster

276 after 400 ns (Fig. 4D and 4E). The final cluster shape was achieved at around 420 ns and  
277 remained stable until the end of the simulation. The largest cluster in all simulations was  
278 ~ 4.2 nm in diameter and was composed of four PMB1 molecules and ~20 osmolytes  
279 (one trehalose, five putrescine, seven glycerol and seven OPG). In this cluster, only two  
280 of the PMB1 molecules are directly associated with each other, interacting *via* their DPhe7  
281 residues. The formation of the cluster was initiated by many of the molecules binding to  
282 the cell wall (within 30 ns of the start of the simulation), while the full cluster had formed  
283 after ~100 ns and lasted for around 240 ns. Despite showing a higher preference for  
284 cluster formation in the cell wall area, a few aggregates were also observed on the surface  
285 of the inner leaflet of the outer membrane (Figure 4C). For example, in one cluster, one  
286 PMB1 molecule is surrounded by three OPG molecules, two glycerol molecules, one  
287 trehalose molecule and one urea molecule. Glycerol not only intermediates interactions  
288 between PMB1 and OPG, but also with 1-palmitoyl,2-cis-vaccenyl-phosphatidyl  
289 ethanolamine (PVPE) lipids, in this aggregate. PMB1 also interacts with PVPE *via* Dab6  
290 and Dab10 - phosphate salt bridges. Additionally, the cluster was visited by two  
291 putrescine molecules – one remaining in the aggregate for 160 ns and the other for only  
292 50 ns.

293

## 294 **PMB1 interaction with proteins**

295 The number of interactions between PMB1 molecules and proteins were calculated based  
296 on intermolecular contacts (distances < 0.4 nm) during the course of the simulations,  
297 values concatenated over all trajectories for each protein are provided in Table S1.  
298 Interactions of PMB1 were observed with all of the different proteins in the systems. We  
299 consider the lipoprotein carriers, LolA and LolB first. In PMB<sub>prot</sub> and PMB<sub>crowd</sub> PMB1  
300 molecules were found interacting both near to and at the entrance to the hydrophobic  
301 cavities of both proteins (Fig. 5 and 6). It is a useful reminder here that the normal function  
302 of LolA and LolB requires the lipid tails of cargo lipoproteins to bind in their hydrophobic  
303 cavities. A number of different PMB1 to LolA/B binding events were observed in our  
304 simulations. For example, in the PMB<sub>prot</sub> system three molecules of PMB1 were observed  
305 to interact with the entrance to the cavity of LolA simultaneously (Fig. 5A), throughout one  
306 of the 500 ns simulations, with one partially inserted into the cavity. The LolA residues

307 involved in these interactions range from hydrophobic to charged: Trp49 (51%), Met51  
308 (95%), Thr52 (69%), Gln53 (72%), Pro54 (46%), Asp55 (45%), Phe72 (32%) and Glu74  
309 (25%), where parentheses indicate percentage of simulation time for which the  
310 interactions existed, reflecting the chemical diversity of PMB1. Interestingly, in PMB<sub>prot</sub>,  
311 one molecule of PMB1 bound to the entrance of the LolB cavity with its Lip1 residue  
312 inserted into the cavity (Fig. 6). Due to the extended conformation adopted by this PMB1,  
313 several LolB residues participated in long-lasting interactions (more than 60% of total  
314 simulation time) (Fig. 6B-C) with PMB1, including residues previously predicted as  
315 important for the binding of acyl chains<sup>45</sup>, namely Phe37, Val46, Met107 and Ile109. This  
316 indicates that PMB1 can bind in the LolB cavity in a manner that resembles normal the  
317 binding of acyl chains of lipoproteins to LolB.  
318

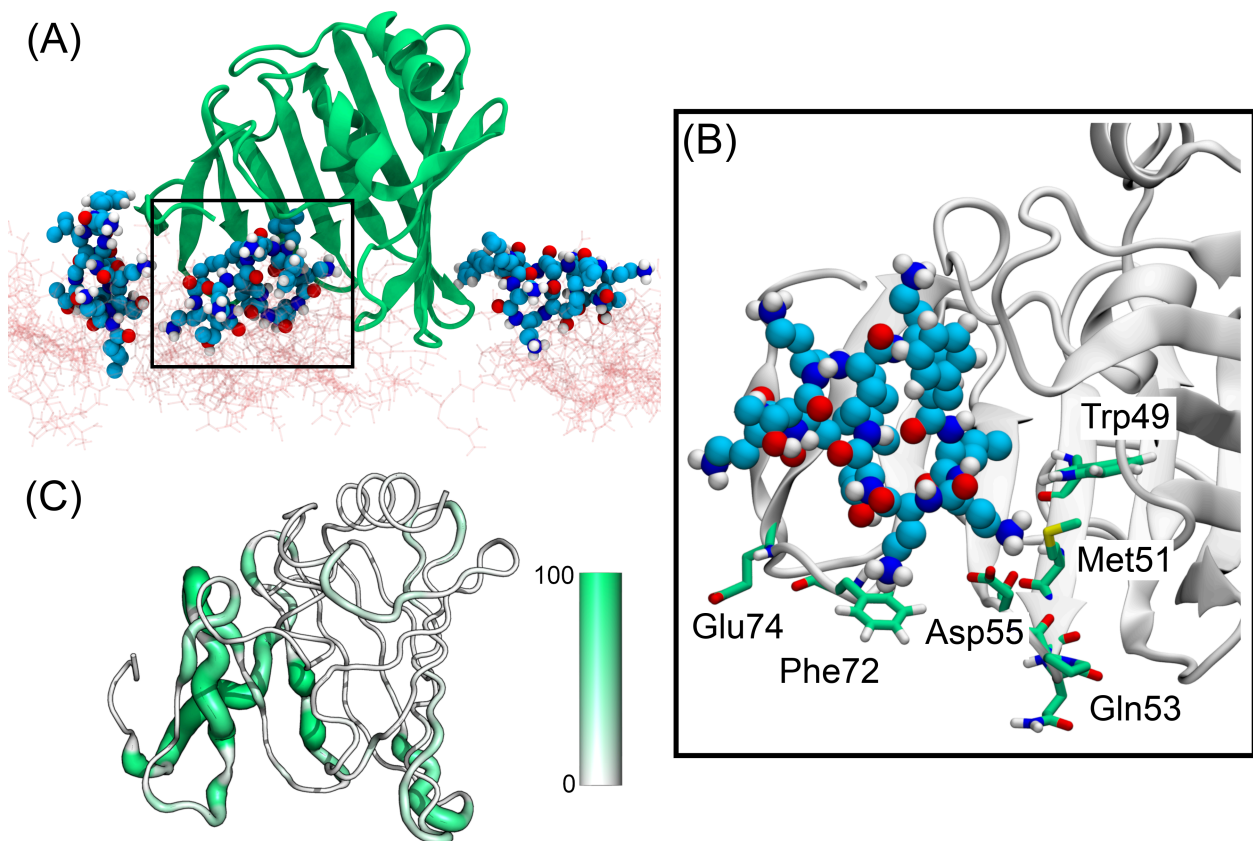

319  
320 **Figure 5: PMB1 binding modes to LolA. In PMB<sub>prot</sub>, three PMB1 bind to LolA at the**  
321 **same time (A) LolA = green, PMB1 = as previously, cell wall = pink sticks). One**  
322 **PMB1 is partially inside the hydrophobic cavity. (B) Zoomed in region where PMB1**  
323 **is bound to the hydrophobic cavity of LolA, interacting mainly with residues Trp49,**

324 **Met51, Gln53, Asp55, Phe72, and Glu74. (C) Sausage representation of LolA with**  
325 **respect to PMB1 interactions. Regions of the protein with higher percentage of time**  
326 **spent interacting with PMB1 are shown as enlarged tube, while regions with fewer**  
327 **interactions are shown as narrower tubes.**

328

329 Next we consider PMB1 - Pal interactions. In both the PMB1<sub>crowd</sub> and PMB1<sub>prot</sub>  
330 simulations, PMB1 was observed sandwiched between the C-terminal domain (CTD)  
331 of Pal, the linker domain and the outer membrane. The interactions lasted for the entirety  
332 of the simulations. Pal residues involved in the interactions are provided in Table S1.  
333 Furthermore, upon PMB1 binding, the motion of the linker region of Pal become more  
334 restricted (Fig. S4), but the initial non-covalent interaction of Pal with peptidoglycan  
335 seems to be unaffected (Fig. S5). Despite that, this binding to the linker appears to limit  
336 the increase in number of contacts between Pal and the cell wall, when compared to  
337 systems that do not have a PMB1 attached to the linker (Fig. S5). More transient PMB1-  
338 Pal binding events also occurred in simulations of each system. In PMB<sub>prot</sub>, a PMB1  
339 molecule entered the area in between the cell wall and the CTD of Pal (residues Ala109,  
340 Asp110, Arg112, Thr114, Tyr117 and Gly149), after initially being bound to a BLP for 370  
341 ns (Fig. S6A). Other examples of PMB1 exchanging binding partners were also observed  
342 from Pal to LolA (Fig. S6B), from BLP to LolB (Fig. S6C), and from BLP to BLP (Fig. S6D).  
343 Thus, showing that within 500 ns PMB1 can move from interacting with one protein to  
344 another. In PMB<sub>crowd</sub>, after intermittently interacting with Leu176 and Lys185 in the Pal  
345 CTD for 160 ns, one PMB1 moved slightly away from Pal and associated with another  
346 PMB1 forming a dimer (Fig. S7). While the same region of Pal that was previously bound  
347 to the original PMB1 formed an interaction with a small cluster containing one molecule  
348 of OPG, one molecule of Glycerol and one molecule of putrescine. This small cluster also  
349 simultaneously interacted with the newly formed PMB1 dimer, which at this stage was not  
350 directly interacting with Pal.

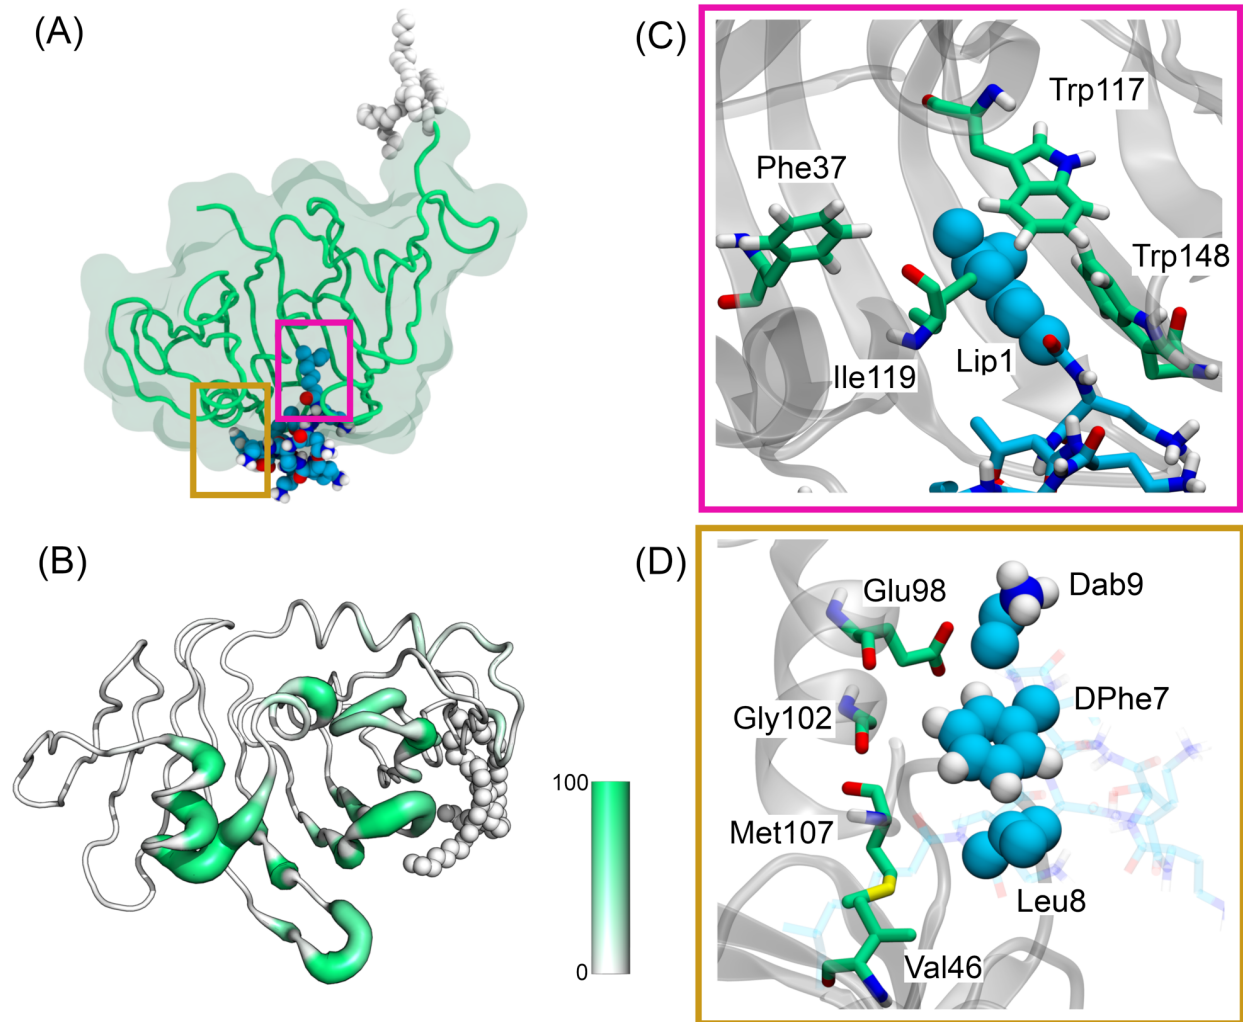

351  
352 **Figure 6: PMB1 binding mode to LoIB. (A) PMB1 inserts Lip1 inside the**  
353 **hydrophobic cavity of LoIB, reaching hydrophobic residues that usually interacts**  
354 **with acyl chains from lipoprotein ligands. (B) Sausage plot representation of the**  
355 **structure of LoIB. Regions of the protein with higher percentage of time (from 0 to**  
356 **1, coloured from white to green) spent interacting with PMB1 are shown as**  
357 **enlarged tube, while regions with less interactions are shown in thinner tubes. (C)**  
358 **Zoomed-in region showing binding at the hydrophobic cavity of LoIB. In this area,**  
359 **Lip1 interacted with Phe37, Ile109, Trp117, and Trp148. (D) Zoomed-in region**  
360 **showing binding at the exterior part of LoIB. In this region DPhe7, Leu8 and Dab9**  
361 **interacted with residues Val46, Glu98, Gly102 and Met107.**  
362



363 PMB1 interactions with OmpA were mainly with the CTD. Each system had two or three  
364 PMB1 molecules binding to OmpA simultaneously. At least one molecule in each system  
365 was bound at the interface between the OmpA CTD and the cell wall, mediating the  
366 interaction between both structures. This binding region was located between the two  
367 main helices (composed of residues Glu212 to Asn226 and Ser253 to Lys267) from the  
368 CTD, with a prominent role of residues Gln214 (92%) and Tyr263 (87%). Interactions  
369 were hydrogen-bonding (Dab9 - Gln214) and hydrophobic (DPhe7 and Leu8 – Tyr263) in  
370 nature. Pal and OmpA have some structural similarities in their C-terminal domains  
371 (similarity of 35%), and both are known to bind to the cell wall<sup>46-48</sup>. Analysis of the contact  
372 data between PMB1-Pal and PMB1-OmpA revealed two long-lived interactions involving  
373 a specific helix from the CTD of each protein. This helix is composed of residues  
374 H<sub>112</sub>ANFLRSNPS<sub>122</sub> in Pal and Y<sub>244</sub>SQLSNLDP<sub>252</sub> in OmpA. Interestingly this region  
375 forms part of the dimerization interface of OmpA, thus would only be available for  
376 interaction when the protein is in its monomeric state<sup>16,48</sup>. Additionally, PMB1 was  
377 observed to bind to these regions while simultaneously interacting with adjacent motifs  
378 (Fig. S8) in both proteins: Q<sub>63</sub>MQQLQ<sub>68</sub> in Pal (a short helix) and K<sub>290</sub>GIPADKIS<sub>298</sub> (a  
379 loop connecting an  $\alpha$ -helix to a  $\beta$ -strand). Interestingly only one PMB1 across all  
380 simulations was observed binding directly to the linker region of OmpA (in PMB<sub>prot</sub>), in  
381 PMB<sub>crowd</sub>, the linker area is largely occupied by osmolytes.

382 Comparison of data from PMB1 binding to BLP and Pal, revealed a short motif comprising  
383 the sequence S-S-E/D/N-X-Q/N (Fig. S9). Serine and acidic residues have particular  
384 propensity to interact with PMB1 (Fig. S10) due to the possibility of interacting *via*  
385 hydrogen bonding or salt bridges. Interactions between these residues and PMB1 lasted  
386 from 20 ns up to 400 ns. In simulations containing proteins, the four BLPs were the main  
387 target of binding events, with an average of 6 molecules of PMB1 binding to the four BLPs  
388 per system simulated. Regions of longest interactions (over 70% of simulation time)  
389 include residues S<sub>11</sub>SDVQTLNA<sub>19</sub> (at the vicinity of the cell wall) and Asp34, Asp41,  
390 Ala42, Ala43, Arg48 (adjacent to the outer membrane). A number of the molecules  
391 interacting with BLP were also inserted in the interface with either the cell wall or the outer  
392 membrane in all of the simulations. Interestingly, in the PMB<sub>crowd</sub> system most of the  
393 PMB1s that interacted with BLP were located in the solution region. The interfacial

394 regions favoured by PMB1 in other systems (PMB<sub>dil</sub> and PMB<sub>prot</sub>) were occupied by  
395 osmolytes in PMB<sub>crowd</sub>. Thus, the presence of osmolytes seems to force PMB1 into the  
396 solution to some extent, by occupying interfacial binding regions.

397

### 398 **PMB1 interactions with the cell wall**

399 A number of PMB1 molecules (at least 14) reached the peptidoglycan layer area very  
400 rapidly (within the first 10 ns) in all simulations (Fig. S1 and S11). The negative charges  
401 presented by D-Glu and meso-diaminopimelate (m-DAP) residues from the peptide  
402 portion of the cell wall interact with PMB1. Other interactions are also present, such as  
403 PMB1 forming hydrogen bonds to the hydroxyl groups attached to the pyranosidic rings  
404 of the peptidoglycan glycan strands (Fig. S12). None of the PMB1 molecules were  
405 observed to go through the pores of the cell wall and dissociate from it during the total  
406 time of 3  $\mu$ s of all simulated systems. Most osmolytes also did not cross through the pores  
407 easily: only putrescine, trehalose and urea were able to cross multiple times (Fig. S13).  
408 Generally, two modes of association between PMB1 and the cell wall were observed. In  
409 one mode, PMB1 inserts itself between glycan strands, as seen in one example from  
410 PMB<sub>dil</sub> system (Fig. 7A). In some cases, it acted similarly to a peptide linkage, as it was  
411 able to form salt bridge interactions with both glycan strands simultaneously for more than  
412 200 ns (Fig. 7C), decreasing the local distance between the strands from  $\sim$ 2.7 nm to  $\sim$ 1.9  
413 nm. The other observed mode of association is PMB1 attaching to the surface of the cell  
414 wall, not inserted between the strands, but rather located around peptide linkages (Fig.  
415 7B). A common aspect from both binding modes is that the Dab residues from PMB1  
416 attract the loose peptide portions (not connected to  $>$  1 glycan strand), forming salt  
417 bridges. The insertion mode of interaction involved the formation of multiple long-lived ( $\sim$   
418 200 ns) salt bridges with the Dab - m-DAP and Dab - D-Glu, in contrast, in the surface  
419 binding mode the salt bridges had a lifetime of  $\sim$  100 ns. (Fig. 7D).

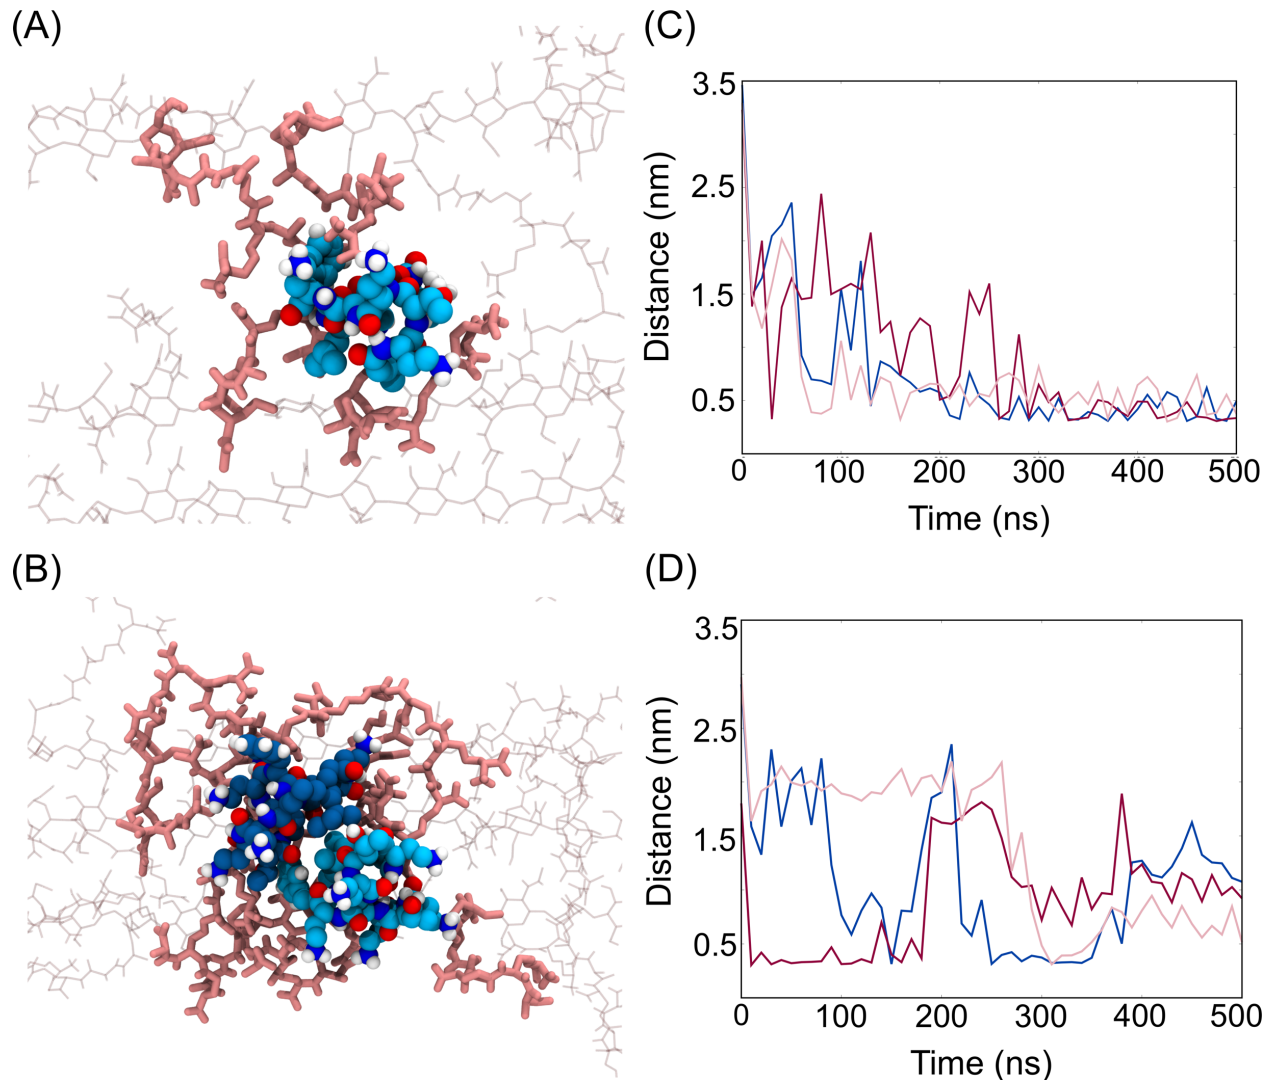

420

421 **Figure 7: PMB1 binding modes to the cell wall extracted from  $PMB_{dil}$  and  $PMB_{prot}$ .**  
422 **The inserted binding mode is depicted on (A), showing PMB1 (blue carbon**  
423 **spheres) attached inside of the pores of the cell wall (pink sticks) and interacting**  
424 **with many negatively charged residues. The surface binding mode is depicted in**  
425 **(B), showing a PMB1 dimer (two shades of blue) bound to the surface of three**  
426 **glycan strands. (C) and (D) shows examples of distances of salt bridges**  
427 **interactions between different Dab residues (PMB1) and m-DAP and D-Glu (cell**  
428 **wall). In the inserted binding mode, interactions seem to last longer overall than in**  
429 **the surface binding mode.**

430

431

432 In the PMB<sub>prot</sub> system, a few of the PMB1 molecules mediated protein binding to the cell  
433 wall (Fig. 8). For example, PMB1 bound to the surface of LolA, interacting with residues  
434 Lys23, Asp26 and Glu34, while at the same time interacting with m-DAP and D-Glu from  
435 the cell wall. An observation from both simulations of the PMB<sub>prot</sub> system, was an  
436 extension of the OmpA linker region that appeared to be induced by PMB1 which is bound  
437 to the CTD region. By around 420 ns, there is an increase in the number of residues from  
438 OmpA contacting the cell wall, increasing from 5 to 10 (Fig. S14). This appeared to occur  
439 spontaneously, but subsequently the PMB1 Dab residues form salt bridges with three  
440 charged groups (two D-Glu and one m-DAP) of the loose peptide ends of the cell wall  
441 (Fig. 8 and S14). These interactions of PMB1 which is bound to both OmpA and the cell  
442 wall, seemed to have acted as a driving force to push the OmpA CTD further towards the  
443 cell wall, stabilizing and increasing the OmpA-peptidoglycan binding interface from 10  
444 residues to almost 20. Similarly, in the PMB<sub>crowd</sub> system, some associations between the  
445 PMB1, proteins (OmpA, LolA and Pal) and the cell wall were also observed. For example,  
446 initially, a PMB1 is associated with the OmpA CTD mediated by two trehalose molecules  
447 and one glycerol molecule (Fig. 8). At the same time, the same PMB1, one of the  
448 trehalose, glycerol and residue Asn249 of OmpA were in the vicinity of the cell wall (within  
449 0.6 nm), displaying a few hydrogen bonding interactions. By the end of the simulation,  
450 this cluster had dissociated. Another example is the PMB1-Pal association mentioned in  
451 the previous section with the presence of a small cluster of osmolytes (Fig. 8). Residue  
452 Asp179 of Pal interacted with OPG, glycerol, and putrescine molecules while they were  
453 bound to PMB1 and/or the cell wall, the interaction partners in this cluster changed  
454 frequently over time, indicating the non-specificity of these intermolecular associations.

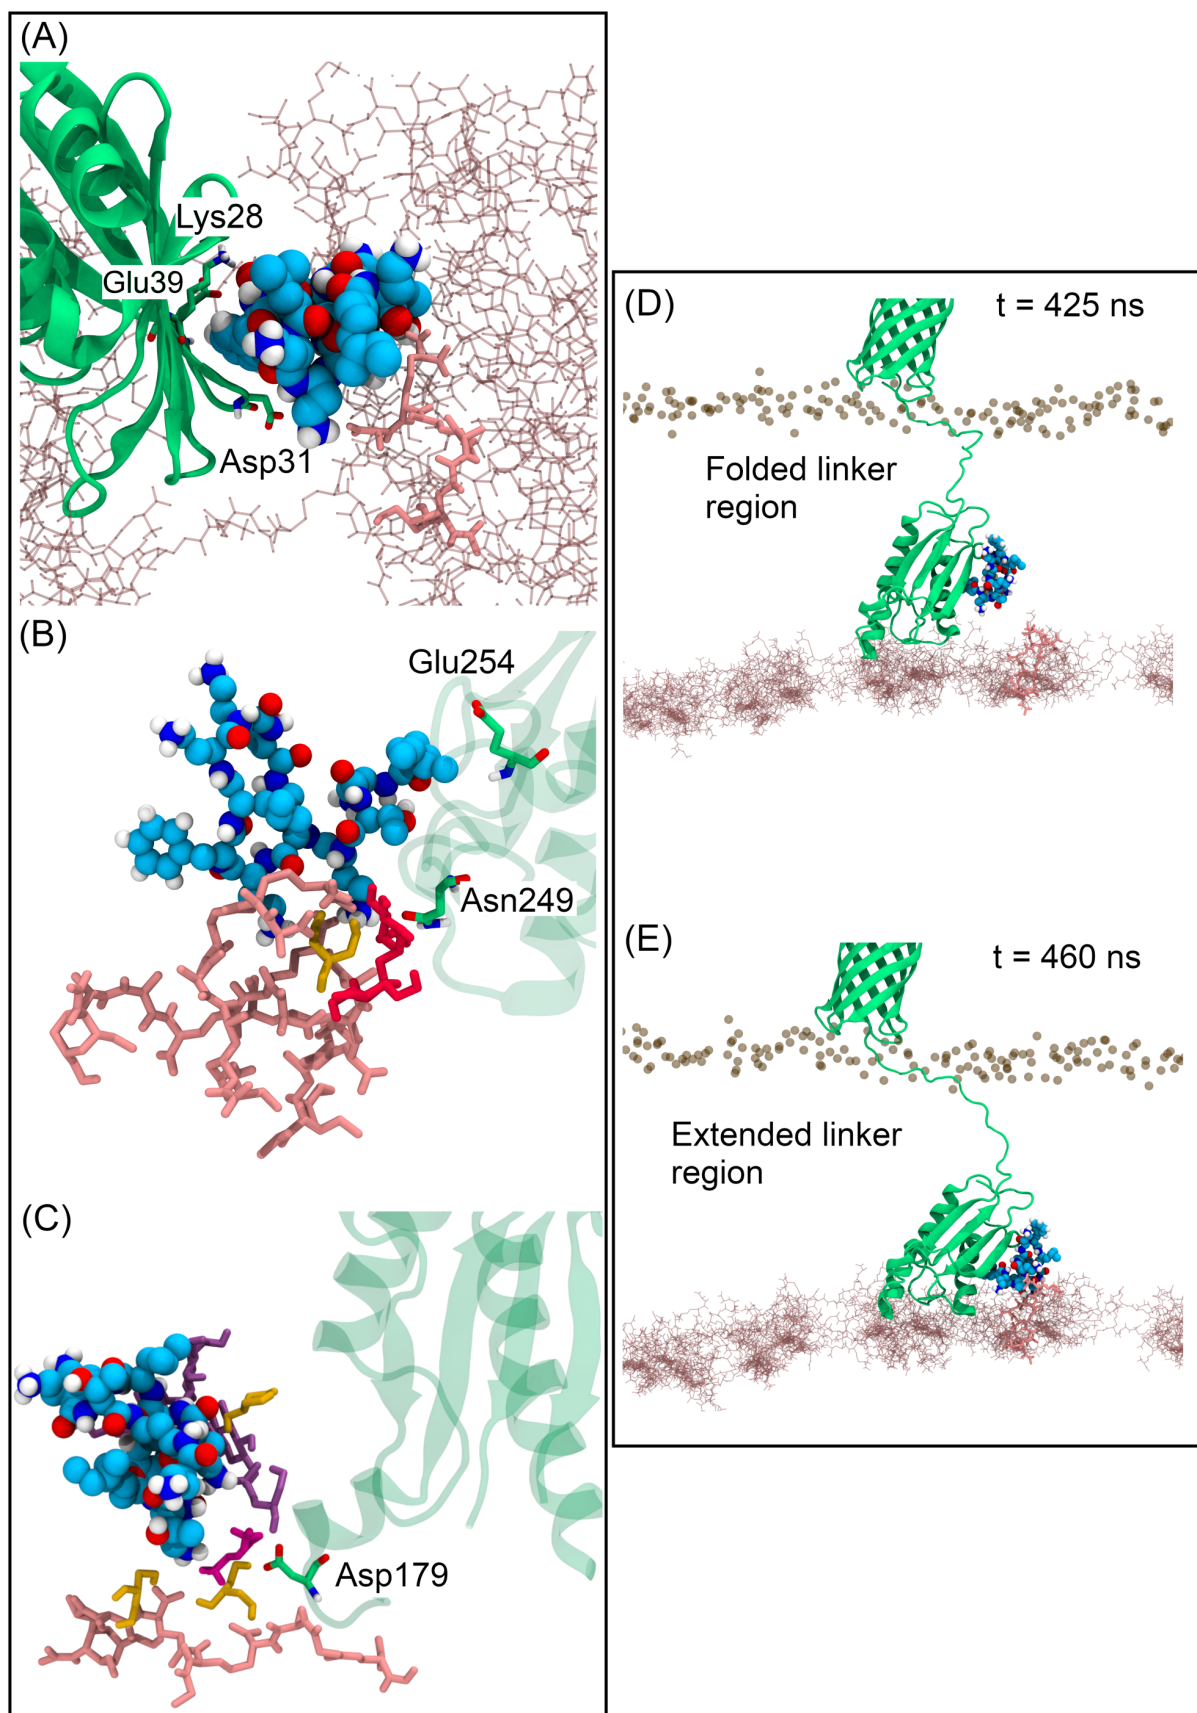

456 **Figure 8: PMB1 mediating interactions between LolA, Pal, OmpA (green) and the**  
457 **cell wall (pink sticks). Panel (A) shows highlighted residues Asp26, Lys23 and**  
458 **Glu34 (green) from LolA interacting with Dab (Asp26) and DPhe7 (Lys23 and**  
459 **Glu34,) from PMB1 (colored in blue spheres), while another Dab from PMB1**  
460 **interacts with a negative charged residue from the cell wall (pink licorice sticks). In**  
461 **Panel (B), PMB1 and osmolytes (glycerol – orange; trehalose – red) are shown**  
462 **mediating interactions for OmpA-cell wall. In (C), a bigger cluster containing OPG,**  
463 **putrescine, glycerol and urea is shown mediating interactions with Pal and the cell**  
464 **wall. Panels (D) and (E) depict two different states of OmpA and PMB1, before (D)**  
465 **and after (E) enhancing the interaction with the cell wall. In (B) and (C), only cell**  
466 **wall residues that are in contact with PMB1 and osmolytes are shown to improve**  
467 **clarity.**

468

## 469 **Discussion**

470 Currently there is a great need to find novel therapeutic agents to address the problem of  
471 antimicrobial resistance to antibiotics<sup>49,50</sup>. In order to do so in a rational manner requires  
472 a thorough understanding of the environment faced by antibiotics such as PMB1 as they  
473 negotiate the bacterial cell envelope. In this work, we have simulated an atomistic model  
474 of the periplasmic space to study the fate of PMB1 in this region once it has already  
475 crossed the OM. Our results predict that PMB1, and likely other drugs relying on diffusion  
476 alone to cross the periplasm, face a complex path, full of molecular obstacles which hinder  
477 their movement through the periplasm. The presence of structures from subcellular  
478 compartments in our model systems had a major effect on the diffusion coefficients of  
479 PMB1 molecules. This was observed by the 100-fold reduction in values in the periplasm  
480 models compared to PMB1 just in solution. Similarly, diffusion of native proteins was also  
481 affected by increased crowding. Previous studies of diffusion rates in the cytoplasm and  
482 the periplasm showed that the GFP proteins have a slightly slower diffusion rate in the  
483 periplasm<sup>38</sup> when compared to the cytoplasm<sup>38</sup> and there have been some discussions in  
484 the literature regarding the nature of the periplasm being a gel-like environment<sup>51</sup> or a  
485 fluid environment<sup>38</sup>. At the level of crowding we have in our simulations the system is  
486 clearly still fluid. Crowding up to 30% of volume has been reported previously to have

487 modest effects on water properties<sup>34</sup>, showing alterations in the self-diffusion coefficient  
488 of water that are in-line with our simulations ( $\sim 20\%$  Volume with  $\sim 2.0 \times 10^{-5} \text{ cm}^2/\text{s}$ ).

489 PMB1 is an amphipathic molecule with considerable conformational flexibility. In just  
490 water and ions, we observed PMB1 tetramers forming micelles with sizes comparable to  
491 experimental data<sup>30</sup> for micelle formation in solution of colistin (polymyxin E). In addition,  
492 as predicted for colistin and its analogue<sup>39</sup>, our micelle formation followed a “closed  
493 association” model, in which the number of monomers is discrete, limiting micelles to a  
494 certain size (pentamers with 2.6 nm). Thus, our model of PMB1 in water provided a  
495 ‘baseline’ reference system which gave aggregate sizes and dynamical behavior that  
496 reproduced experimental observables for similar molecules.

497 We observed a wide range of associations of PMB1 with other molecules. One particularly  
498 interesting phenomenon observed here is PMB1 insertion into the hydrophobic cavities  
499 of the lipoprotein carriers LolA and LolB. These cavities have previously been shown to  
500 be non-specific binders of hydrophobic molecules<sup>52-54</sup>. Our results suggest it is possible  
501 that some PMB1s may be carried through the cell wall by hijacking the lipoprotein carrying  
502 functionalities of LolA/LolB. Given we observe PMB1 adhering to the cell wall this  
503 ‘hitchhiking’ mechanism would be advantageous in providing an easier route through the  
504 cell wall. To our knowledge this spontaneous phenomenon is described here for the first  
505 time. It is important to consider here other potential consequences of PMB1 binding to  
506 the lipoprotein carriers. LolA and LolB play important roles in avoiding toxicity due to  
507 accumulation of BLP in the inner membrane<sup>55,56</sup>. Binding of PMB1 into their hydrophobic  
508 cavities may serve to inhibit their natural functions and lead to mislocalization of  
509 lipoproteins in the inner membrane, in a similar manner to small hydrophobic inhibitors  
510 such as MAC13243<sup>52-54</sup>. Interestingly, LolA transcription is triggered with increasing  
511 concentrations of PMB, a mechanism connected to the activation of the stress regulator  
512 Rcs phosphorelay system<sup>57</sup> which provides indirect evidence to support our hypothesis.

513 Osmolyte - PMB1 interactions varied depending upon the chemistry of the osmolyte. We  
514 observed fast formation of small clusters of molecules, with PMB1 usually binding to, and  
515 often becoming partially coated with the polar OPG and glycerol molecules. The OPG  
516 concentration becomes slowly diluted when bacteria are moved to concentrated media<sup>58</sup>.

517 Given the high propensity for these molecules to bind to PMB1 in our simulations, we

518 suggest that the changes in the OPG concentration may also impact on dynamics of  
519 PMB1 in the periplasm. As discussed in previous simulation studies<sup>34,35,37</sup>, molecular  
520 crowders can promote a range of effects, including excluded volume effects and replacing  
521 interactions. In our simulations, osmolytes mediate interactions between other molecules  
522 and also replace some interactions. For example in the absence of osmolytes, there is a  
523 greater propensity for PMB1-BLP interactions to occur at the BLP/cell wall and BLP/OM  
524 interfaces, however these regions are occupied by osmolytes in the most crowded  
525 system, and consequently PMB1 interactions with BLP are largely with the region of the  
526 protein in 'bulk' solution in the periplasm. This suggests that the non-specific binding of  
527 osmolytes to cell envelope components may have local consequences for available  
528 binding modes for antibiotics.

529 Two main peptidoglycan binding modes were observed; one in which PMB1 inserts  
530 in between glycan strands acting as a pseudo cross-link and one in which it is surface-  
531 bound close to the peptide linkages. Atomic Force Microscopy (AFM)<sup>59</sup> studies have  
532 suggested that the cell wall interactions formed by colistin may be responsible for  
533 rigidifying the cell envelope.

534 A limitation of our results involves the correction of the diffusion coefficients for  
535 finite-size effects. Given the complexity of our models, with the presence of the outer  
536 membrane and the cell wall, that our simulation boxes are non-cubic, and that the  
537 correction becomes smaller with increasing box size, we opted for not applying it in these  
538  $D_t$  values. Our results for proteins and water diffusion correlate well with previous  
539 atomistic crowding models<sup>34-37</sup>. Experimental studies<sup>38,60</sup> reported  $D_t$  rates for GFP that  
540 are in a similar range to ours. We note here that experimental value for the OmpA N-  
541 terminal domain (transmembrane) alone,  $D_{\text{exp}} = 4.9 \pm 0.09 \times 10^{-7} \text{ cm}^2/\text{s}$  is faster than the  
542 value obtained for the complete protein from our simulations ( $D_t = 3.1 \pm 0.6 \times 10^{-8}$   
543  $\text{cm}^2/\text{s}$  in  $\text{PMB}_{\text{prot}}$  and  $D_t = 1.8 \pm 0.5 \times 10^{-8} \text{ cm}^2/\text{s}$  in  $\text{PMB}_{\text{crowd}}$ ). The C-terminal domain of  
544 OmpA is bound to the peptidoglycan which is highly likely to be the cause of the slower  
545 diffusion in the simulations.

546 It is also worth mentioning that the SPC water model (which works well with the  
547 GROMOS54a7 force field<sup>61</sup>) overestimates experimental values of self-diffusion for water  
548 molecules<sup>62</sup>, so  $D_t$  values for solutes possibly are affected by this. Finally, crowding



549 systems simulations are very complex and could lead to intense aggregation when using  
550 standard additive force fields<sup>63,64</sup>, with several methods being proposed to solve this<sup>65,66</sup>.  
551 From our perspective, GROMOS54a7 was a reasonable choice, since it is one of the  
552 force fields that shows a lesser preference for the aggregated state<sup>70</sup>, while also having  
553 validated parameters for the complex mixture of lipids that compose the bacterial outer  
554 membrane and the bacterial cell wall. Our results where comparable with other  
555 experimental and simulation studies are in-line with those, providing further confidence in  
556 the predictions from the complex simulations which go beyond previous studies in terms  
557 of the resolution and complexity of the simulations studied.

558

## 559 **Conclusions**

560 In conclusion, atomistic molecular dynamics simulations of the antibiotic PMB1 in a  
561 number of models of the periplasm of Gram-negative bacteria with differing levels of  
562 crowding have revealed slower diffusion of the antibiotic as the periplasm becomes more  
563 crowded. PMB1 forms complexes with osmolytes, the cell wall and native cell envelope  
564 proteins which can be short-lived or long-lived. PMB1 is rarely uncomplexed within the  
565 periplasm, therefore its functional groups are occupied in interaction with other species  
566 more often than not. We feel this is an important factor to consider in future development  
567 of antibiotics (and may be extended to drugs that target other organisms too). The *in vivo*  
568 environment is not a chemistry experiment in which ones controls the type and number  
569 of molecules involved, and the complexity of the former may impact upon foreign  
570 molecules such as drugs in many unexpected ways. The simulations described here  
571 show that incorporation of the chemical details of the local environment can predict likely  
572 interactions with other species and highlight potential mechanistic pathways that may  
573 have been originally unintended (such as the ability of PMB1 to bind to LolA and LolB).

574

## 575 **Methods**

576

### 577 **System Preparation**

578 We constructed the template model based on previously published works from our  
579 group<sup>17,48,67</sup>. This was composed by an asymmetric outer membrane (OM) of an identical  
580 composition as seen in previous works<sup>17,67-69</sup>, a one-layer peptidoglycan cell wall (PGN)  
581 formed by 12 glycan strands of 17 repeating NAG-NAM-peptide units, four Braun  
582 Lipoproteins (BLP) covalently attached to PGN and inserted in the membrane by  
583 tripalmitoyl-S-glycerol-cysteine residues<sup>67,69</sup>. Models for BLP(PDB: 1EQ7)<sup>70</sup>, LolA (PDB:  
584 1IWL) and LolB (PDB: 1WLM)<sup>45</sup>, OmpA<sup>16</sup>, Pal (PDB: 2W8B)<sup>71</sup> were taken from previous  
585 works from the group<sup>72,48,54,67</sup>. Pal and OmpA proteins were also included in PMB<sub>prot</sub> and  
586 PMB<sub>crowd</sub> systems. Crystallographic structures of LolA and LolB GROMOS 54A7 force  
587 field with the GROMOS 53A6OXY ether parameters<sup>73</sup> were used for the construction of  
588 the tripalmitoyl-S-glycerol-cysteines. After setting up this initial template system, we  
589 added the other components: Pal bound and unbound to the cell wall, PMB1 molecules,  
590 and ions concentrations. PMB1 GROMOS 54a7 parameters were obtained by using the  
591 Automated Topology Builder (ATB) server<sup>74</sup>. For OmpA insertions into the OM, we  
592 employed the *gmx membed* tool<sup>75</sup>, similarly to a previous report<sup>67</sup>.

593 For the construction of the PMB<sub>crowd</sub> system, parameters for the molecular crowders were  
594 obtained using the ATB server, with the exception of OPG and trehalose, in which the  
595 GROMOS 56a6 (CARBO)<sup>76</sup> parameters were employed, which are compatible with  
596 GROMOS 54a7. We adapted the “droplet methodology” from Bortot *et al*<sup>37</sup> to deal with  
597 the insertion of osmolytes, by adding each osmolyte with a water shell obtained from 100  
598 ns molecular dynamics simulations.

599

## 600 **Atomistic Molecular Dynamics Simulations**

601 We performed molecular dynamics simulations employing the GROMACS simulation  
602 suite (version 2018.3)<sup>77</sup> along with GROMOS54a7 force field<sup>61</sup> and SPC water model<sup>33</sup>.  
603 We divided the simulations in two parts: equilibration simulations in NVT and NPT  
604 ensembles with position restraints in proteins, cell wall, and PMB1, which lasted for 1 and  
605 100 ns, respectively; and production simulations in NPT ensemble, which ran for 500 ns.  
606 Simulations were performed at 310 K, which was maintained by employing the velocity  
607 rescale thermostat<sup>78</sup> with a coupling constant of  $\tau = 0.1$ . Pressure was maintained semi-  
608 isotropically at 1 atm by employing the Parrinello-Rahman barostat<sup>79</sup> with a time constant

609 of 2 ps. The particle mesh Ewald method treated long-range electrostatics<sup>80</sup>. LINCS  
610 algorithm<sup>81,82</sup> constrained the covalent bonds, which allowed an integration step of 2 fs.  
611 Both long-range electrostatics and van der Waals cutoffs were set to 1.4 nm. To neutralize  
612 charges, we added the correct number of counterions together with an extra salt  
613 concentration of 0.2 M of sodium chloride ions for all simulations. For the replicates,  
614 starting positions of the proteins and PMB1 molecules were changed, along with re-  
615 solvation of the system, equilibration and production phases. In addition, we modified the  
616 starting velocities to ensure the difference between runs and improve conformational  
617 sampling. For molecular manipulation, visualization, and analysis, we employed the VMD  
618 software<sup>83</sup>.

619

## 620 **Analysis**

621 Translational diffusion coefficients,  $D_t$ , were obtained by using the *gmx msd* analysis tool  
622 from the GROMACS tool set to calculate the mean square displacements (MSD). MSD  
623 plots (Figure S2) were calculated for time delays The linear fit (where the slope was  
624 obtained) was performed in different time regimes (1-10 ns; 50-100 ns) for PMB1 and  
625 water (1-10 ns; 10-100 ns) aiming to capture the slowdown in  $D_t$  due to crowding effects,  
626 while for proteins, the linear fit was performed in the range of 5-15 ns. Error estimates  
627 were obtained by averaging over all and by averaging over replicate simulations of each  
628 system. For the XYZ motion analysis, the *gmx trajectory* tool was employed to obtain the  
629 coordinates of the center of mass of each PMB1 in the X, Y and Z axis. Radial distribution  
630 function values (RDF) were obtained using the *gmx rdf* tool, while *gmx sasa* was used for  
631 SASA calculations. In-house scripts were employed for the intermolecular contact  
632 analysis.

633

## 634 **ASSOCIATED CONTENT**

### 635 **Supporting Information**

636

637 The Supporting Information is available free of charge on the ACS Publications website.

638

639 Further analysis of the data including Figures S1-S14 and Table S1 (PDF file).

640

641

## 642 **Author Contributions**

643 The manuscript was written through contributions of all authors. SK conceived the project,  
644 CP conducted the simulations, IPSS and AB helped with simulation setup and analysis,  
645 CP and SK also performed analysis, CP and SK wrote the paper. All authors have given  
646 approval to the final version of the manuscript.

647

## 648 **Acknowledgements**

649 The authors acknowledge the use of the IRIDIS High Performance Computing Facility,  
650 and associated support services at the University of Southampton, in the completion of  
651 this work. This project made use of time on ARCHER granted via the UK High-End  
652 Computing Consortium for Biomolecular Simulation, HECBioSim (<http://hecbiosim.ac.uk>),  
653 supported by EPSRC through grant number EP/R029407/1, which also supports CP.

654

## 655 **References**

- 656 1. Weiner JH, Li L. 2008. Proteome of the Escherichia coli envelope and technological  
657 challenges in membrane proteome analysis. *Biochim Biophys Acta - Biomembr*  
658 1778:1698–1713.
- 659 2. Goemans C, Denoncin K, Collet J-FF. 2014. Folding mechanisms of periplasmic  
660 proteins. *Biochim Biophys Acta - Mol Cell Res* 1843:1517–1528.
- 661 3. Vaara, M. 2019. Polymyxins and Their Potential Next Generation as Therapeutic  
662 Antibiotics. *Front. Microbiol.* 10, 1689.
- 663 4. Morrison, D. C., Jacobs, D. M. 1976. Binding of polymyxin B to the lipid A portion of  
664 bacterial lipopolysaccharides. *Immunochemistry.* 13, 813-818.
- 665 5. Bader, J., Teuber, M. 1973. Action of polymyxin B on bacterial membranes, I. Binding to  
666 the O-antigenic lipopolysaccharide of Salmonella typhimurium. *Z Naturforsch [C]* 28,  
667 422-430.
- 668 6. Evans, M. 1999. Polymyxin B sulfate and colistin: Old antibiotics for emerging  
669 multiresistant Gram-negative bacteria. *Ann. Pharmacother.* 33, 960–967.
- 670 7. Trimble, M. J., Mlynarcik, P., Kolar, M. & Hancock, R. E. W. 2016. Polymyxin: alternative  
671 mechanisms of action and resistance. *Cold Spring Harb. Perspect. Med.* 6, a025288.
- 672 8. Gales, A. C., Jones, R. N., Sader, H. S. 2011. Contemporary activity of colistin and  
673 polymyxin B against a worldwide collection of Gram-negative pathogens: results from  
674 the SENTRY Antimicrobial Surveillance Program (2006–09). *J. Antimicrob. Chemother.*  
675 66, 2070–2074.

- 676 9. Li, Z., Cao, Y., Yi, L., Liu, J. H., Yang, Q. 2019. Emergent Polymyxin Resistance: End of  
677 an Era? *Open Forum Infec. Dis.* 6, ofz368.
- 678 10. Li Z & Velkov T. 2019. Polymyxins: Mode of Action. *Adv. Exp. Med. Biol.* 1145, 37-54.
- 679 11. Vollmer, W. & Holtje, J. V. 2004. The architecture of the murein (peptidoglycan) in gram-  
680 negative bacteria: vertical scaffold or horizontal layer(s)? *J Bacteriol.* 186, 5978–5987.
- 681 12. Hirota Y, Suzuki H, Nishimura Y, Yasuda S. 1977. On the process of cellular division in  
682 *Escherichia coli*: A mutant of *E. coli* lacking a murein-lipoprotein. *Proc. Natl. Acad. Sci.*  
683 *USA.* 74 (4), 1417-1420.
- 684 13. Matsuyama S, Tajima T, Tokuda H. 1995. A novel periplasmic carrier protein involved in  
685 the sorting and transport of *Escherichia coli* lipoproteins destined for the outer  
686 membrane. *EMBO J.* 14, 3365–3372.
- 687 14. Matsuyama SI, Yokota N, Tokuda H. 1997. A novel outer membrane lipoprotein, LolB  
688 (HemM), involved in the LolA (p20)-dependent localization of lipoproteins to the outer  
689 membrane of *Escherichia coli*. *EMBO J.* 16, 6947–6955.
- 690 15. Smith SG, Mahon V, Lambert MA, Fagan RP. 2007. A molecular Swiss army knife:  
691 OmpA structure, function and expression. *FEMS Microbiol Lett.* 273 (1), 1-11.
- 692 16. Marcoux J, Politis A, Rinehart D, Marshall DP, Wallace MI, Tamm LK2, Robinson CV.  
693 2014. Mass spectrometry defines the C-terminal dimerization domain and enables  
694 modeling of the structure of full-length OmpA. *Structure.* 22 (5), 781-90.
- 695 17. Boags, A., Samsudin, F., Khalid, S. 2019. Binding from both sides: TolR and OmpA bind  
696 and maintain the local structure of the *E. coli* cell wall. *Structure* 27, 713-724
- 697 18. Mizuno T. 1979. A novel peptidoglycan-associated lipoprotein found in the cell envelope  
698 of *Pseudomonas aeruginosa* and *Escherichia coli*. *J Biochem.* 86 (4), 991-1000.
- 699 19. Lazzaroni JC, Portalier R. 1992. The excC gene of *Escherichia coli* K-12 required for cell  
700 envelope integrity encodes the peptidoglycan-associated lipoprotein (PAL). *Mol*  
701 *Microbiol.* 6 (6), 735-42.
- 702 20. Bontemps-Gallo S, Lacroix JM. 2015. New Insights into the Biological Role of the  
703 Osmoregulated Periplasmic Glucans in Pathogenic and Symbiotic Bacteria. *Environ*  
704 *Microbiol Rep.* 7 (5), 690–697.
- 705 21. Ruhai R, Kataria R, Choudhury B. 2013. Trends in bacterial trehalose metabolism and  
706 significant nodes of metabolic pathway in the direction of trehalose accumulation *Microb.*  
707 *Biotechnol.* 6(5), 493–502.
- 708 22. Wortham BW, Oliveira MA, Patel CN. 2007. Polyamines in Bacteria: Pleiotropic Effects  
709 Yet Specific Mechanisms, *Adv Exp Med Biol*, 603, 106-15.
- 710 23. Murarka A, Dharmadi Y, Yazdani SS, Gonzalez R. 2008. Fermentative Utilization of  
711 Glycerol by *Escherichia coli* and Its Implications for the Production of Fuels and  
712 Chemicals. *Appl Environ Microbiol.* 74 (4), 1124–1135.
- 713 24. Martínez-Gómez K. et al. 2012. New insights into *Escherichia coli* metabolism: carbon  
714 scavenging, acetate metabolism and carbon recycling responses during growth on  
715 glycerol. *Microb Cell Fact.* 11:46.
- 716 25. Beckers G, Bendt AK, Krämer R, Burkovski A. 2004. Molecular Identification of the Urea  
717 Uptake System and Transcriptional Analysis of Urea Transporter- and Urease-Encoding  
718 Genes in *Corynebacterium glutamicum*. *J Bacteriol.* 186 (22), 7645–7652.

- 719 26. Cayley DS, Guttman HJ, Record Jr MT. 2000. Biophysical Characterization of Changes  
720 in Amounts and Activity of Escherichia Coli Cell and Compartment Water and Turgor  
721 Pressure in Response to Osmotic Stress. *Biophys J*, 78 (4), 1748-64.
- 722 27. Boos, W. Ehmann U, Bremer E, Middendorf A, Postma P. 1987. Trehalase of  
723 Escherichia coli. Mapping and cloning of its structural gene and identification of the  
724 enzyme as a periplasmic protein induced under high osmolarity growth conditions. *J Biol*  
725 *Chem*, 262 (27), 13212-8.
- 726 28. Cohen, S.S. 1997. *A Guide to the Polyamines*. Oxford University Press, New York, USA.
- 727 29. Shah P & Swiatlo E. 2008. A Multifaceted Role for Polyamines in Bacterial Pathogens.  
728 *Mol Microbiol*, 68 (1), 4-16.
- 729 30. Wang D, Weng J, Wang W. 2019. Glycerol transport through the aquaglyceroporin GlpF:  
730 bridging dynamics and kinetics with atomic simulation. *Chem Sci*, 10 (29), 6957-6965.
- 731 31. Krishnamurthy P. et al. 1998. Helicobacter pylori Containing Only Cytoplasmic Urease Is  
732 Susceptible to Acid. *Infect Immun*. 66 (11), 5060–5066.
- 733 32. Lima MPM, Nader M, Santos DES, Soares TA. 2019. Compatibility of GROMOS-Derived  
734 Atomic Parameters for Lipopolysaccharide Membranes with the SPC/E Water Model and  
735 Alternative Long-Range Electrostatic Treatments Using Single Nonbonded Cutoff and  
736 Atom-Based Charge Schemes. *J. Braz. Chem. Soc.* 30 (10), 2219-2230.
- 737 33. Berendsen, H. J., Postma, J. P. M., van Gunsteren, W. F. & Hermans, J. 1981. In  
738 *Intermolecular Forces* (ed. Pullman, B.) 331–342 (Reidel Publishing, 1981).
- 739 34. Harada R, Sugita Y, Feig M. 2012. Protein Crowding Affects Hydration Structure and  
740 Dynamics. *J. Am. Chem. Soc.* 134, 4842–4849.
- 741 35. von Bülow S, Siggel M, Linke M, Hummer G. 2019. Dynamic cluster formation  
742 determines viscosity and diffusion in dense protein solutions. *Proc Natl Acad Sci U S A*.  
743 116 (20), 9843-9852.
- 744 36. Yu I, Mori T, Ando T, Harada R, Jung J, Sugita Y, Feig M. 2016. Biomolecular  
745 interactions modulate macromolecular structure and dynamics in atomistic model of a  
746 bacterial cytoplasm. *Elife*. 5, e19274.
- 747 37. Bortot LO, Bashardanesh Z, van der Spoel D. 2020. Making Soup: Preparing and  
748 Validating Models of the Bacterial Cytoplasm for Molecular Simulation. *J. Chem. Inf.*  
749 *Model*. 60, 322–331.
- 750 38. Mullineaux CW, Nenninger A, Ray N, Robinson C. 2006. Diffusion of green fluorescent  
751 protein in three cell environments in Escherichia coli. *J. Bacteriol.* 188 (10), 3442-3448.
- 752 39. Wallace et al. 2011. Self-assembly behaviour of colistin and its prodrug colistin  
753 methanesulfonate: implications for solution stability and solubilization. *J Phys Chem B*.  
754 114 (14), 4836–4840.
- 755 40. Ando T, Skolnick J. 2010. Crowding and hydrodynamic interactions likely dominate  
756 in vivo macromolecular motion. *Proc Natl Acad Sci USA*. 107, 18457–18462.
- 757 41. Minton AP. 1980. Excluded volume as a determinant of protein structure and stability.  
758 *Biophys J*. 32, 77–79.
- 759 42. Muramatsu N, Minton AP. 1989. Hidden self-association of proteins. *J Mol Recognit*.  
760 1, 166–171.
- 761 43. Stradner A, et al. 2004. Equilibrium cluster formation in concentrated protein  
762 solutions and colloids. *Nature*. 432, 492–495.

- 763 44. Paulino J, et al. 2019. Influenza A M2 channel clustering at high protein/lipid ratios:  
764 Viral budding implications. *Biophys J.* 116, 1075–1084.
- 765 45. Takeda et al. 2003. Crystal structures of bacterial lipoprotein localization factors, LolA  
766 and LolB. *EMBO J.* 22 (13), 3199–3209.
- 767 46. Koebnik R. 1995. Proposal for a peptidoglycan-associating  $\alpha$ -helical motif in the C-  
768 terminal regions of some bacterial cell-surface proteins. *Mol. Microbiol.* 16, 1269–1270.
- 769 47. Parsons L.M., Lin F., Orban J. 2006. Peptidoglycan recognition by Pal, an outer  
770 membrane lipoprotein. *Biochemistry.* 45, 2122–2128.
- 771 48. Samsudin F, Boags A, Piggot TJ, Khalid S. 2017. Braun's Lipoprotein Facilitates OmpA  
772 Interaction with the Escherichia coli Cell Wall. *Biophys. J.* 113, 1496–1504.
- 773 49. Zaman, S. B. et al. 2017. A review on antibiotic resistance: alarm bells are ringing.  
774 *Cureus*, 9 (6), e1403.
- 775 50. Laxminarayan, R. et al. 2013. Antibiotic resistance: the need for global solutions. *Lancet*  
776 *Infect. Dis.* 13, 1057–1098.
- 777 51. Hobot JA, Carlemalm E, Villiger W, Kellenberger E. 1984. Periplasmic gel: new concept  
778 resulting from the reinvestigation of bacterial cell envelope ultrastructure by new  
779 methods. *J Bacteriol.* 160 (1), 143–152.
- 780 52. Pathania R. et al. 2009. Chemical genomics in Escherichia coli identifies an inhibitor of  
781 bacterial lipoprotein targeting. *Nat. Chem. Biol.* 5, 849–856.
- 782 53. Barker, C. A. et al. 2013. Degradation of MAC13243 and studies of the interaction of  
783 resulting thiourea compounds with the lipoprotein targeting chaperone LolA. *Bioorg.*  
784 *Med. Chem. Lett.* 23, 2426–2431.
- 785 54. Boags A, Samsudin F, Khalid S. 2019. Details of hydrophobic entanglement between  
786 small molecules and Braun's lipoprotein within the cavity of the bacterial chaperone  
787 LolA. *Sci. Rep.* 9, 3717.
- 788 55. Grabowicz M, Silhavy TJ. 2017. Redefining the essential trafficking pathway for outer  
789 membrane lipoproteins. *Proc. Natl. Acad. Sci. U.S.A.* 114, 4769–4774.
- 790 56. Caro F, Place NM, Mekalanos JJ. 2019. Analysis of lipoprotein transport depletion in  
791 *Vibrio cholerae* using CRISPRi. *Proc Natl Acad Sci U S A.* 116 (34), 17013-17022.
- 792 57. Tao K, Narita SI, Tokuda H. 2012. Defective Lipoprotein Sorting Induces lolA Expression  
793 through the Rcs Stress Response Phosphorelay System. *J Bacteriol.* 194 (14), 3643–  
794 3650.
- 795 58. Bontemps-Gallo S, Bohin JP, Lacroix JM. 2017. Osmoregulated Periplasmic Glucans.  
796 *EcoSal Plus.* 7 (2).
- 797 59. Mortensen, N. P. et al. 2009. Effects of colistin on surface ultrastructure and  
798 nanomechanics of *Pseudomonas aeruginosa* cells. *Langmuir.* 25, 3728-3733.
- 799 60. Konopka MC, Shkel IA, Cayley S, Record MT, Weisshaar JC. 2006. Crowding and  
800 confinement effects on protein diffusion in vivo. *J Bacteriol.* 188 (17), 6115-6123.
- 801 61. Schmid, N. *et al.* 2011. Definition and testing of the GROMOS force-field versions 54A7  
802 and 54B7. *Eur. Biophys. J.* 40, 843–856.
- 803 62. van der Spoel D, van Maaren PJ, Berendsen HJC. 1998. A systematic study of water  
804 models for molecular simulation: Derivation of water models optimized for use with a  
805 reaction field. *J. Chem. Phys.* 108 (24), 10220-10230.

- 806 63. Petrov D, Zagrovic B. 2014. Are Current Atomistic Force Fields Accurate Enough to  
807 Study Proteins in Crowded Environments? *PLoS Comput Biol.* 10 (5), e1003638.
- 808 64. Abriata LA, Dal Peraro M. 2015. Assessing the potential of atomistic molecular dynamics  
809 simulations to probe reversible protein-protein recognition and binding. *Scientific*  
810 *Reports.* 5, 10549.
- 811 65. Best, R. B.; Zheng, W.; Mittal, J. 2014. Balanced protein–water interactions improve  
812 properties of disordered proteins and nonspecific protein association. *J. Chem. Theory*  
813 *Comput.* 10, 5113–5124.
- 814 66. Carballo-Pacheco, M.; Ismail, A. E.; Strodel, B. 2018. On the Applicability of Force Fields  
815 to Study the Aggregation of Amyloidogenic Peptides Using Molecular Dynamics  
816 Simulations. *J. Chem. Theory Comput.* 14, 6063–6075.
- 817 67. Samsudin F, Ortiz-Suarez ML, Piggot TJ, Bond PJ, Khalid S. 2016. OmpA: A Flexible  
818 Clamp for Bacterial Cell Wall Attachment. *Structure* 24, 2227–2235.
- 819 68. Piggot TJ, Holdbrook DA, Khalid S. 2011. Electroporation of the *E. coli* and *S. Aureus*  
820 membranes: molecular dynamics simulations of complex bacterial membranes. *J. Phys.*  
821 *Chem.* 115, 13381–8.
- 822 69. Ortiz-Suarez ML, Samsudin F, Piggot TJ, Bond PJ, Khalid S. 2016. Full-Length OmpA:  
823 Structure, Function, and Membrane Interactions Predicted by Molecular Dynamics  
824 Simulations. *Biophys. J.* 111, 1692–1702.
- 825 70. Shu W, Liu J, Ji H, Lu M. 2000. Core structure of the outer membrane lipoprotein from  
826 *Escherichia coli* at 1.9 Å resolution. *J. Mol. Biol.* 299, 1101–1112.
- 827 71. Bonsor, D. A. et al. 2009. Allosteric beta-propeller signalling in TolB and its manipulation  
828 by translocating colicins. *EMBO J.* 28, 2846–2857.
- 829 72. Szczepaniak J. et al. 2020. The lipoprotein Pal stabilises the bacterial outer membrane  
830 during constriction by a mobilisation-and-capture mechanism. *Nat Comm.* 11, 1305.
- 831 73. Horta, B.A.C., Fuchs, P.F.J., van Gunsteren, W.F., and Hunenberger, P.H. 2011. New  
832 interaction parameters for oxygen compounds in the GROMOS force field: improved  
833 pure-liquid and solvation properties for alcohols, ethers, aldehydes, ketones, carboxylic  
834 acids, and esters. *J. Chem. Theor. Comput.* 7, 1016–1031.
- 835 74. Koziara KB, Stroet M, Alpeshkumar MK, Mark AE. 2014. Testing and validation of the  
836 Automated Topology Builder (ATB) version 2.0: prediction of hydration free enthalpies. *J.*  
837 *Comput. Aided Mol. Des.* 28, 221–233.
- 838 75. Wolf MG. *et al.* 2010. *g\_membed*: efficient insertion of a membrane protein into an  
839 equilibrated lipid bilayer with minimal perturbation. *J. Comput. Chem.* 31, 2169–2174.
- 840 76. Plazinski W, Lonardi A, Hünenberger PH. 2016. Revision of the GROMOS  
841 56A6(CARBO) Force Field: Improving the Description of Ring-Conformational Equilibria  
842 in Hexopyranose-Based Carbohydrates Chains. *J Comput Chem.* 37 (3), 354-365.
- 843 77. Abraham, M. J. *et al.* 2015. GROMACS: High performance molecular simulations  
844 through multi-level parallelism from laptops to supercomputers. *SoftwareX.* 1, 19–25.
- 845 78. Bussi, G., Donadio, D. & Parrinello, M. 2007. Canonical sampling through velocity  
846 rescaling. *J. Chem. Phys.* 126, 014101.
- 847 79. Parrinello, M., Rahman, A. 1981. Polymorphic transitions in single crystals: A new  
848 molecular dynamics method. *J. Appl. Phys.* 52, 7182.



- 849 80. Darden, T., York, D. & Pedersen, L. 1993. Particle mesh Ewald: An  $N \cdot \log(N)$  method for  
850 Ewald sums in large systems. *J. Chem. Phys.* 98, 10089–10092.
- 851 81. Hess, B., Bekker, H., Berendsen, H. J. C. & Fraaije, J. G. E. M. 1997. LINCS: A linear  
852 constraint solver for molecular simulations. *J. Comp. Chem.* 18, 1463–1472.
- 853 82. Hess, B. 2008. P-LINCS: A Parallel Linear Constraint Solver for Molecular Simulation. *J.*  
854 *Chem. Theory Comput.* 4, 116-122.
- 855 83. Humphrey, W. & Dalke, A. 1996. VMD: visual molecular dynamics. *J. Mol. Graph.* 15,  
856 33–38.

857  
858  
859  
860  
861  
862  
863  
864  
865

### For Table of Contents Only

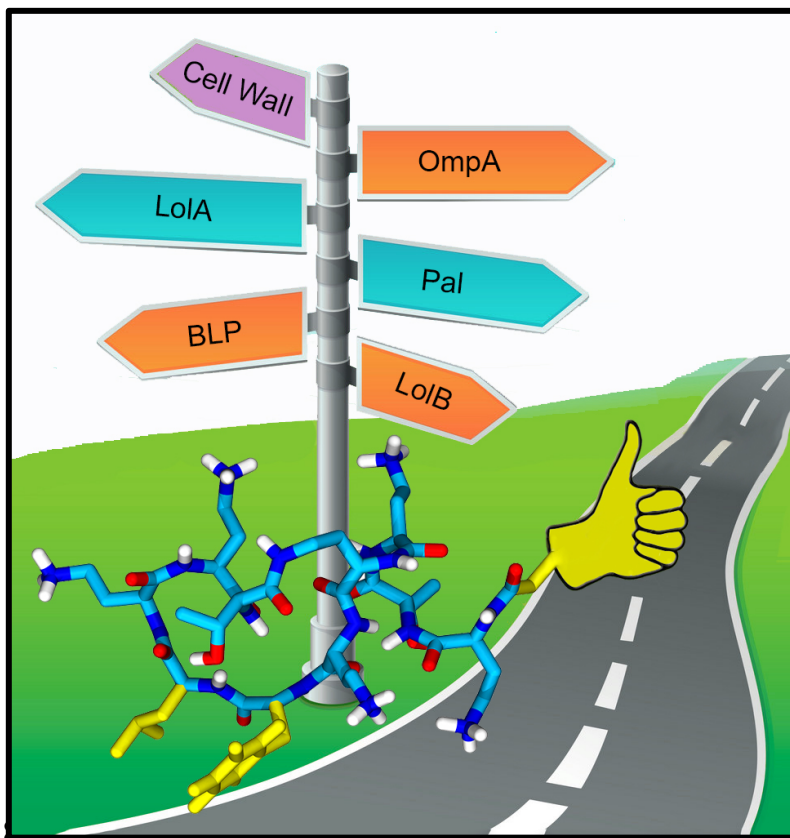

Source: http://biorxiv.org/content/10.1101/2020.06.03.132118v1.full.pdf
